# Supplementary material for: Low Molecular Weight Inhibitors Targeting the RNA-Binding Protein HuR
Source: MDPI journal article supplement (doi:10.3390/ijms241713127), 2023-08-23
Supplement: s1 [file s1]

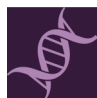

*Supplementary figures & tables*

# Low molecular weight inhibitors targeting the RNA-binding protein HuR

**Benjamin Philipp Joseph** <sup>1,2,†</sup>, **Verena Weber** <sup>1,2,†</sup>, **Lisa Knüpfer** <sup>3</sup>, **Alejandro Giorgetti** <sup>1,4</sup>, **Mercedes Alfonso-Prieto** <sup>1</sup>, **Sybille Krauß** <sup>3,\*</sup>, **Paolo Carloni** <sup>1,2,\*</sup> and **Giulia Rossetti** <sup>1,5,6</sup>

<sup>1</sup> Institute for Neuroscience and Medicine and Institute for Advanced Simulations (INM-9/IAS-5), Computational Biomedicine, Forschungszentrum Jülich, 52425 Jülich, Germany; b.joseph@fz-juelich.de (B.P.J.); v.weber@fz-juelich.de (V.W.); alejandro.giorgetti@univr.it (A.G.); m.alfonso-prieto@fz-juelich.de (M.A.-P.); g.rossetti@fz-juelich.de (G.R.)

<sup>2</sup> Faculty of Mathematics, Computer Science and Natural Sciences, RWTH Aachen University, 52062 Aachen, Germany

<sup>3</sup> Institute of Biology, University of Siegen, 57076 Siegen, Germany; lisa.knuepfer@uni-siegen.de

<sup>4</sup> Department of Biotechnology, University of Verona, 37134 Verona, Italy

<sup>5</sup> Jülich Supercomputing Centre (JSC), Forschungszentrum Jülich, 52425 Jülich, Germany

<sup>6</sup> Department of Neurology, RWTH Aachen University, 44517 Aachen, Germany

\* Correspondence: sybille.krauss@uni-siegen.de (S.K.); p.carloni@fz-juelich.de (P.C.)

† These authors share first authorship as co-first authors.

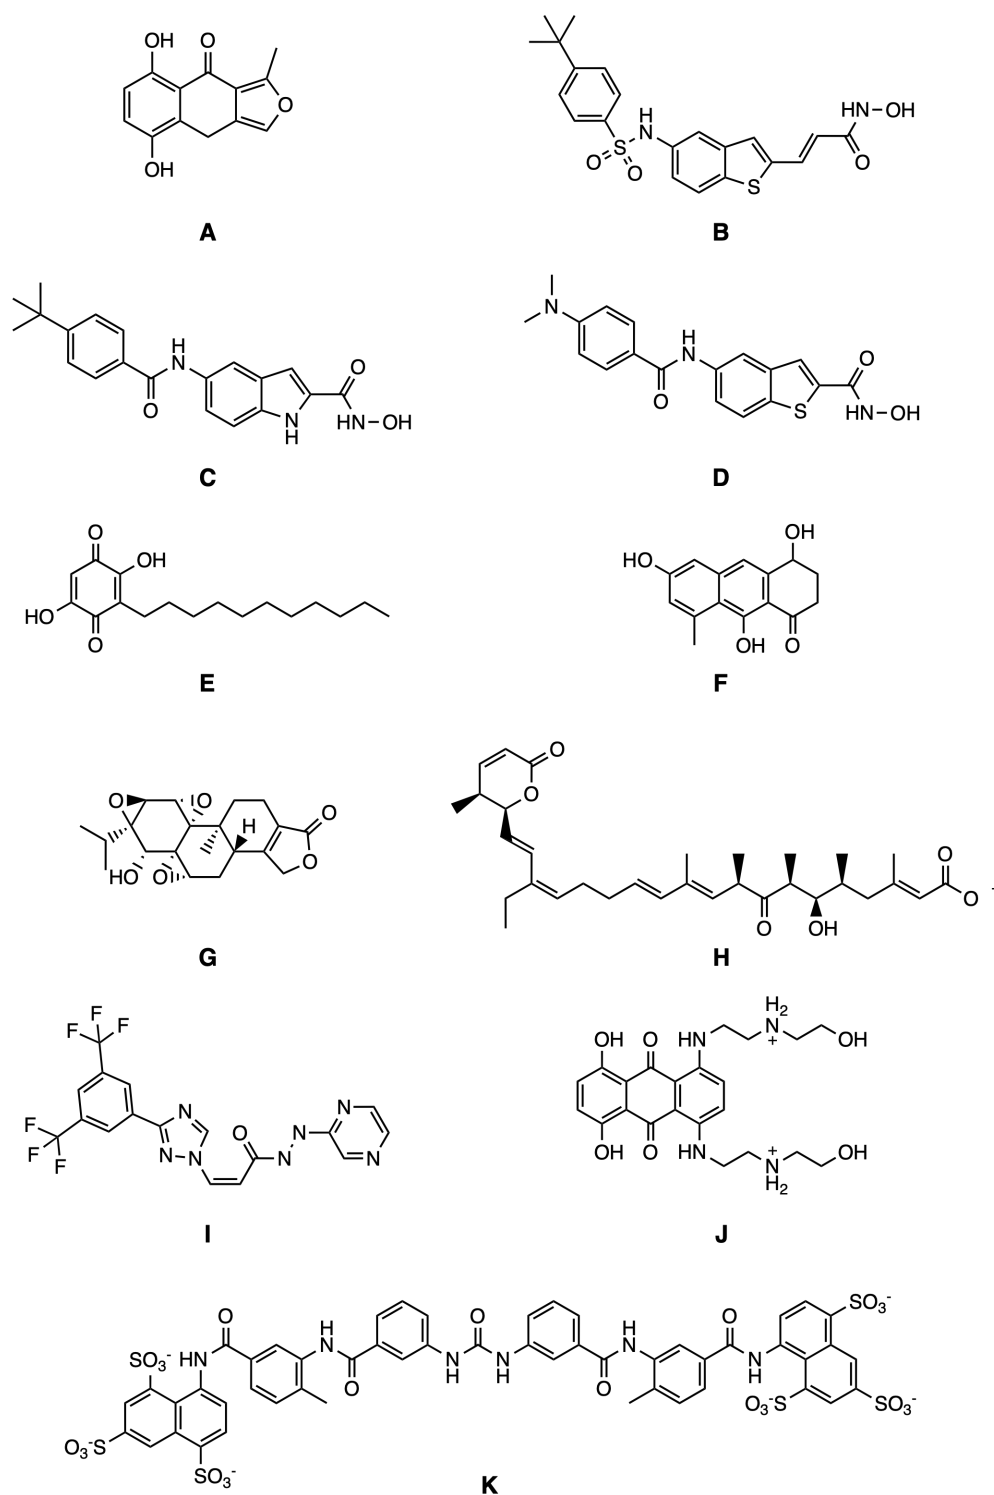

**Figure S1.** Molecular structures of the HuR inhibitors tested *in vivo*. **(A)** MS-444 (also under preclinical trials). **(B)** KH-3, **(C)** KH-3 derivative 1, **(D)** KH-3 derivative 2, **(E)** Embelin, **(F)** Okicenone, **(G)** Triptolide, **(H)** Leptomycin B, **(I)** Selinexor, **(J)** Mitoxantrone and **(K)** Suramin.

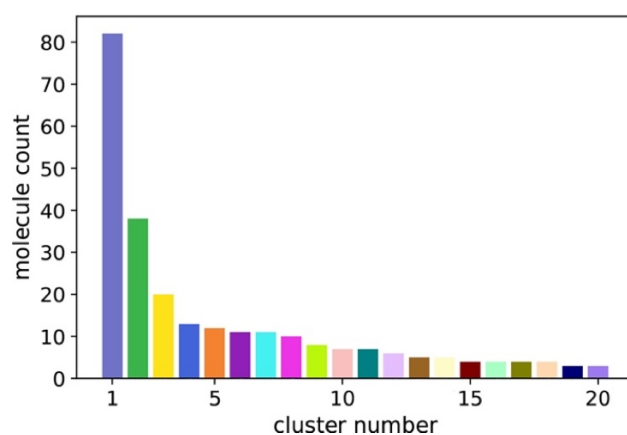

**Figure S2.** Bar plot representing the number of molecules of the first 20 most populated clusters from the HTVS experiment.

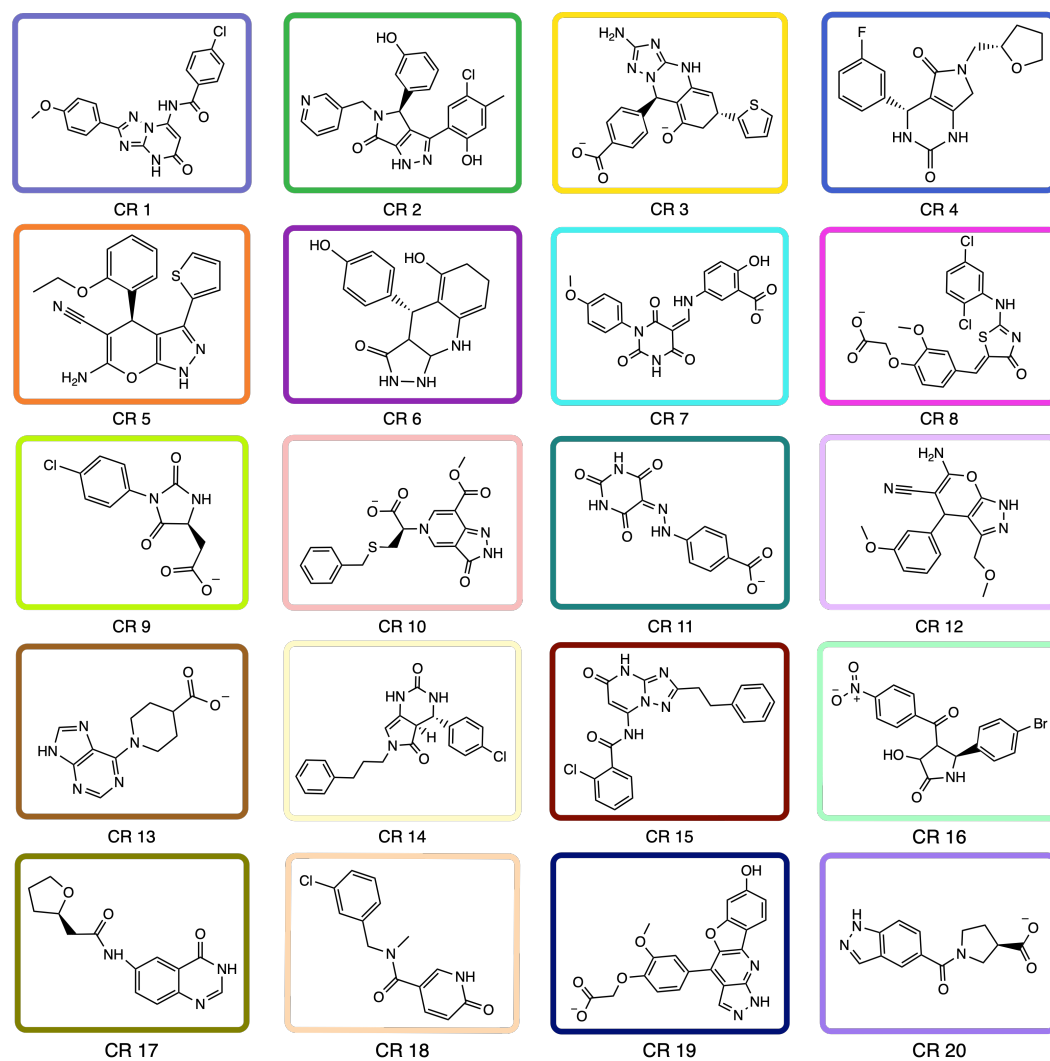

**Figure S3.** Cluster representatives for the 20 most populated clusters.

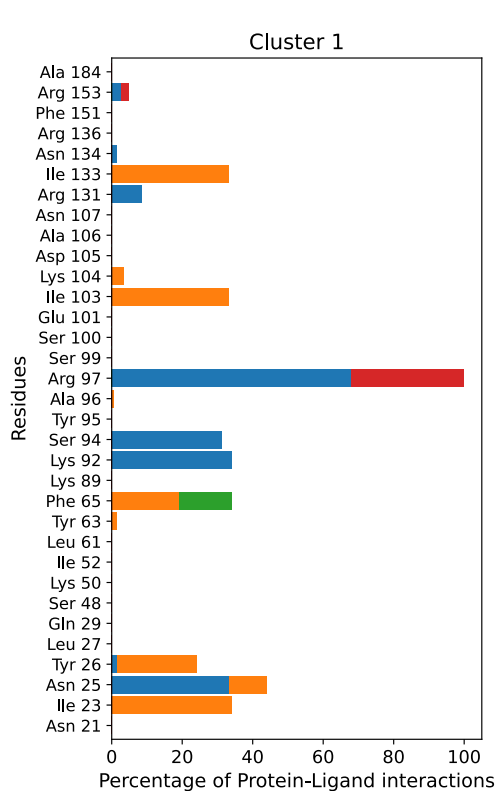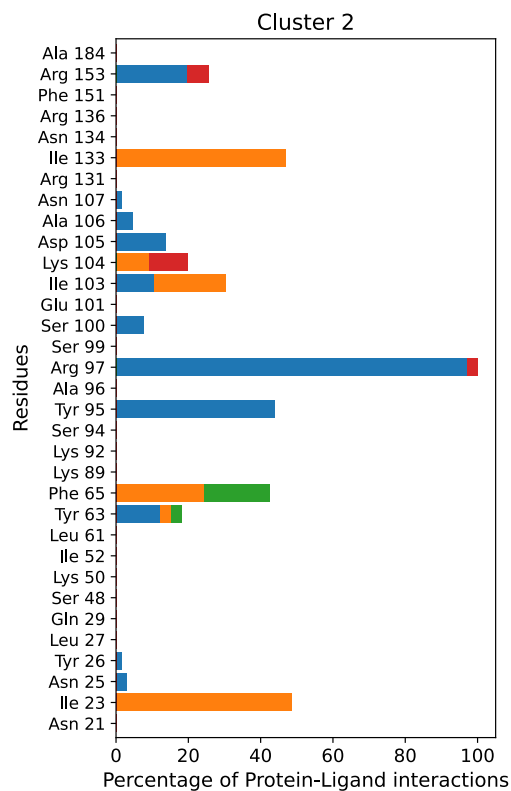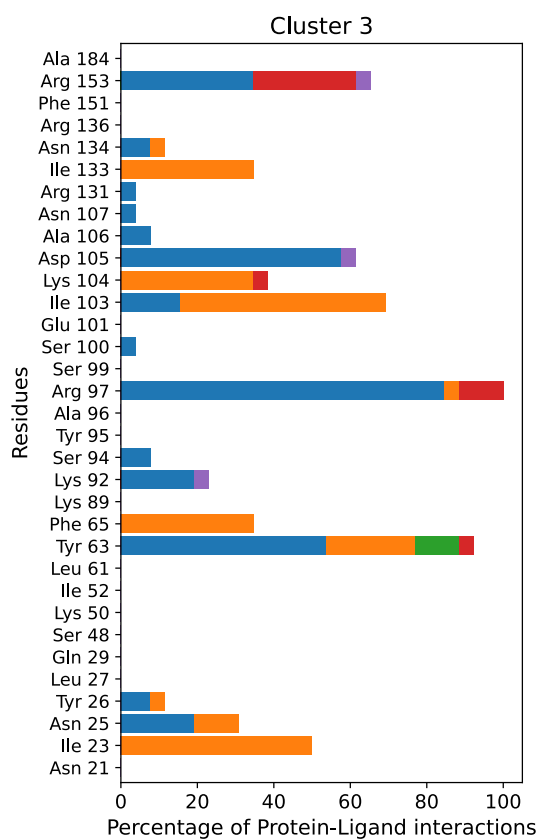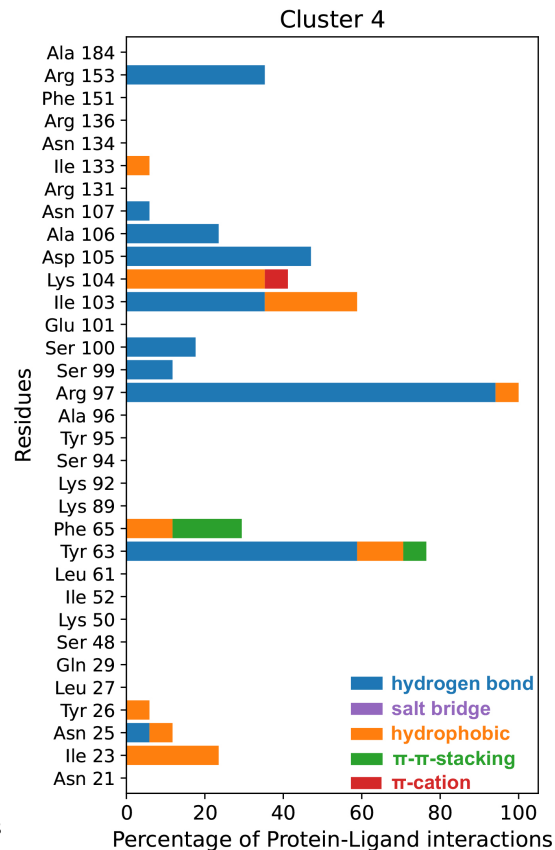



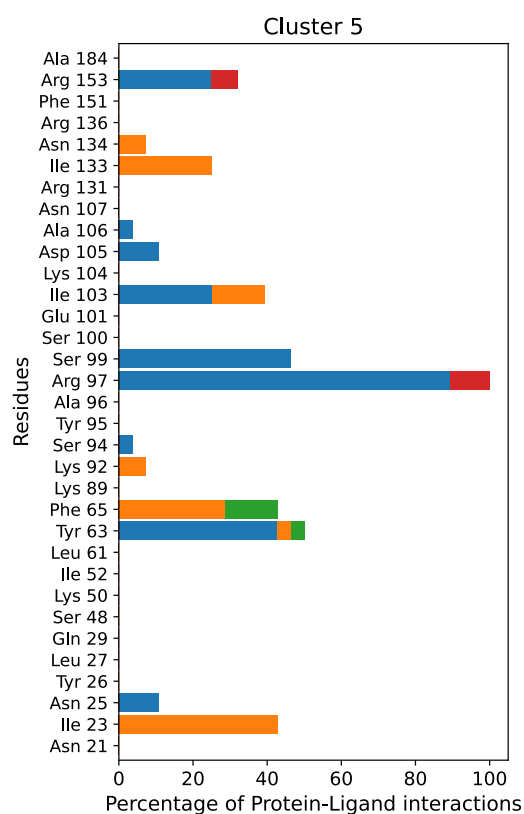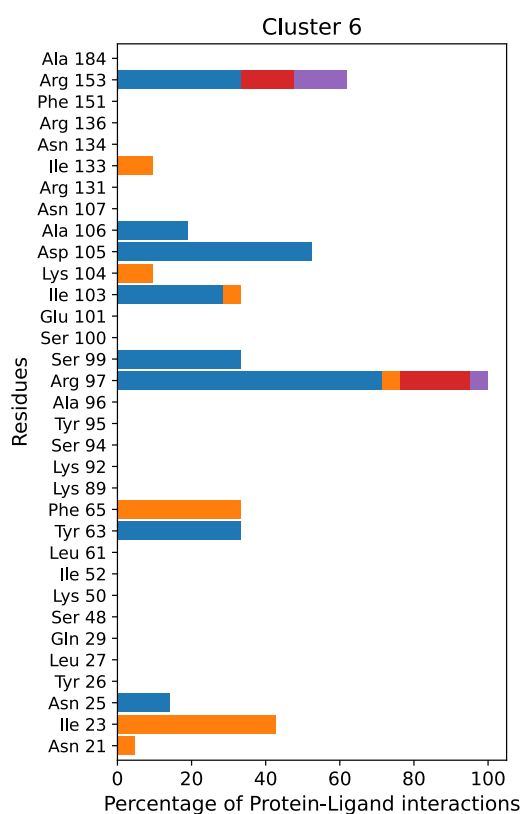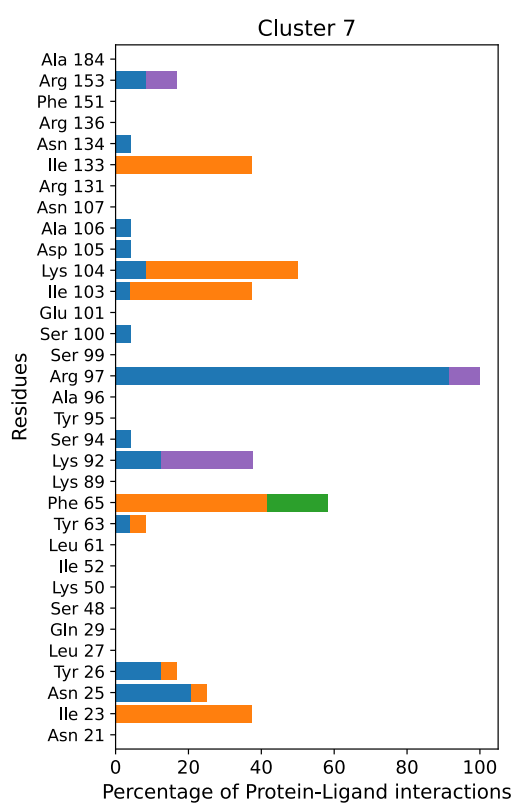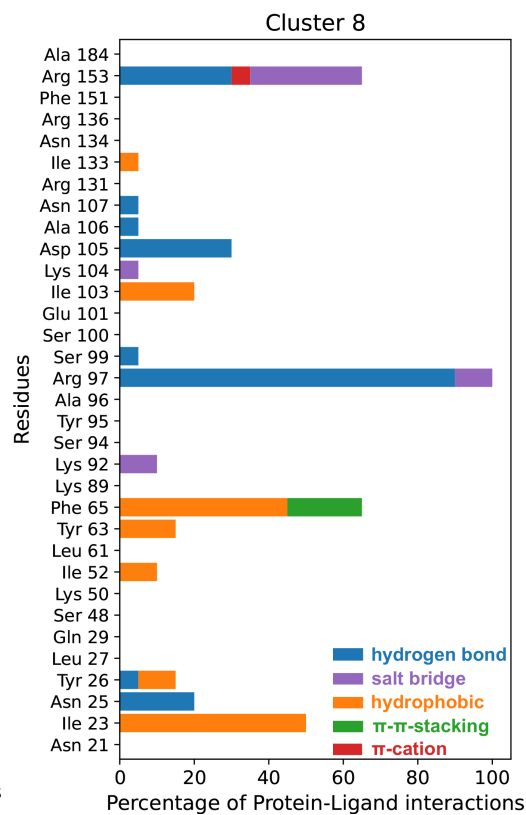

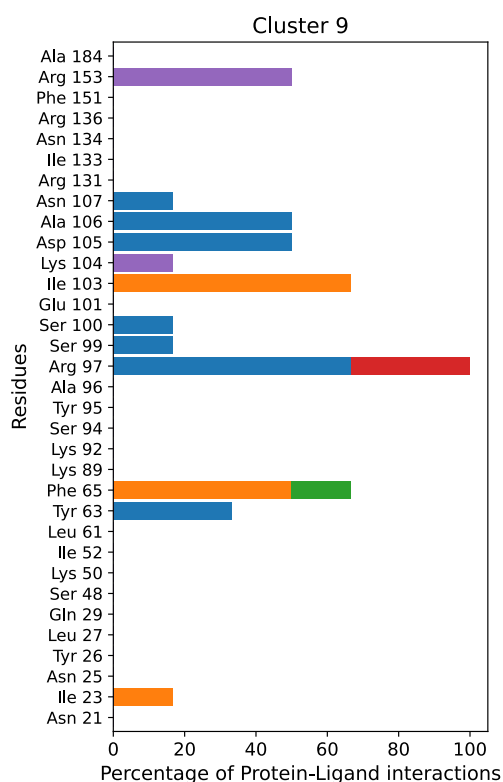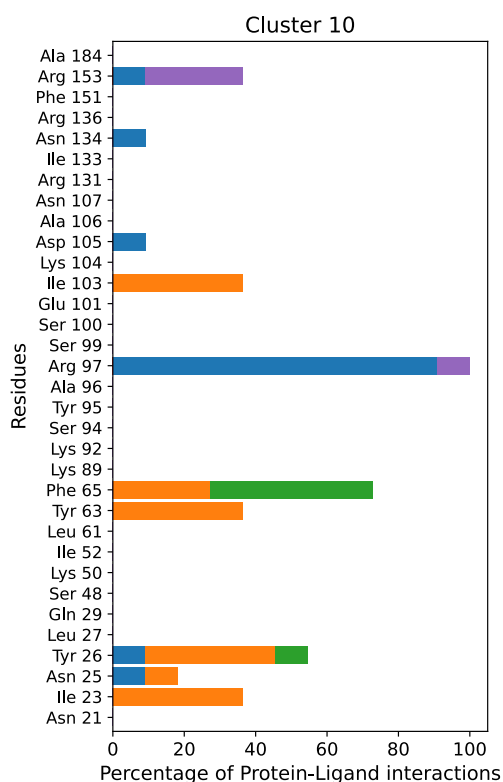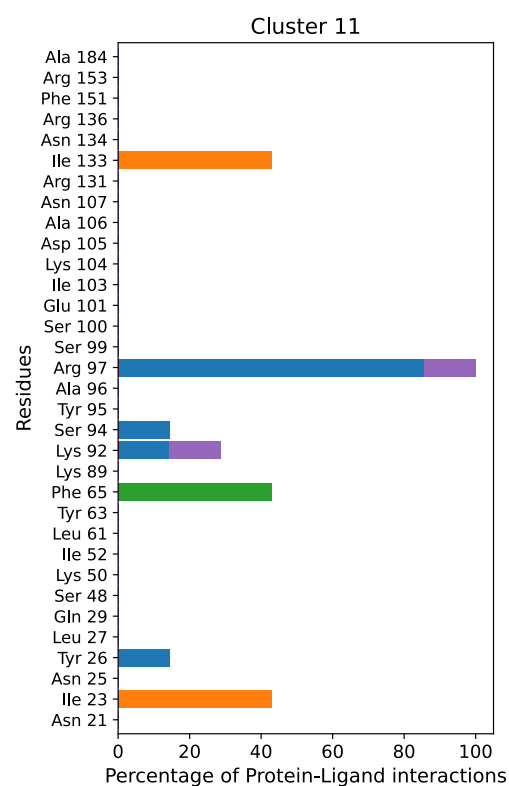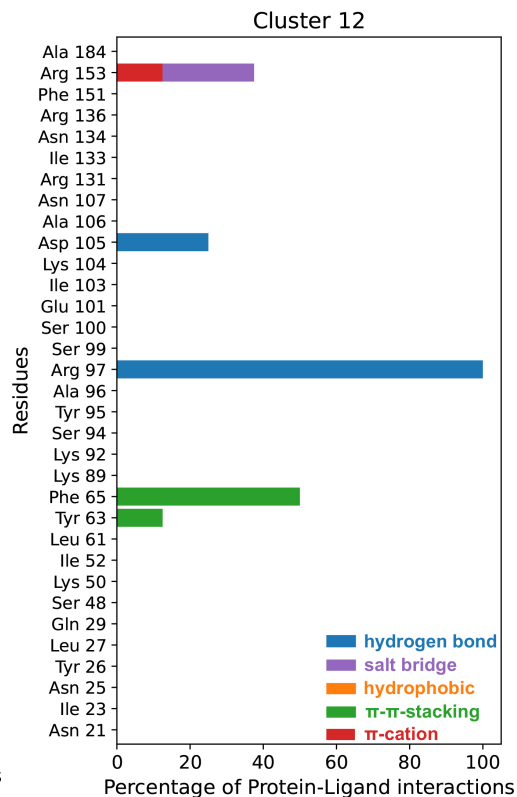

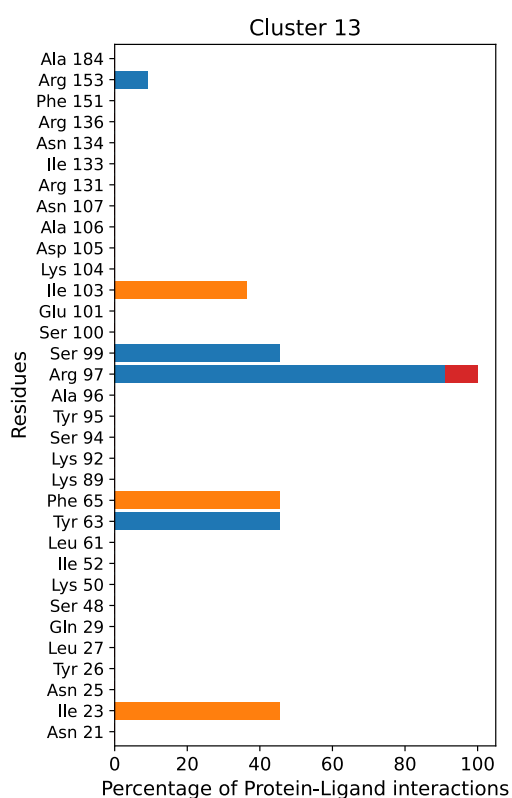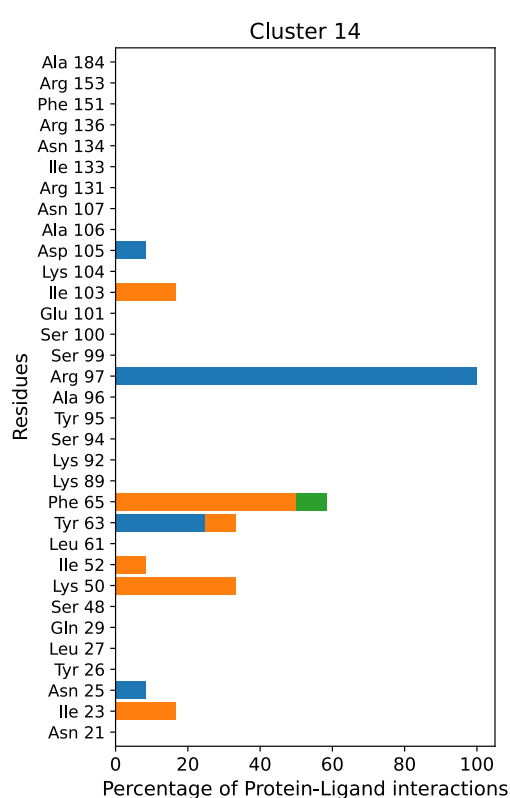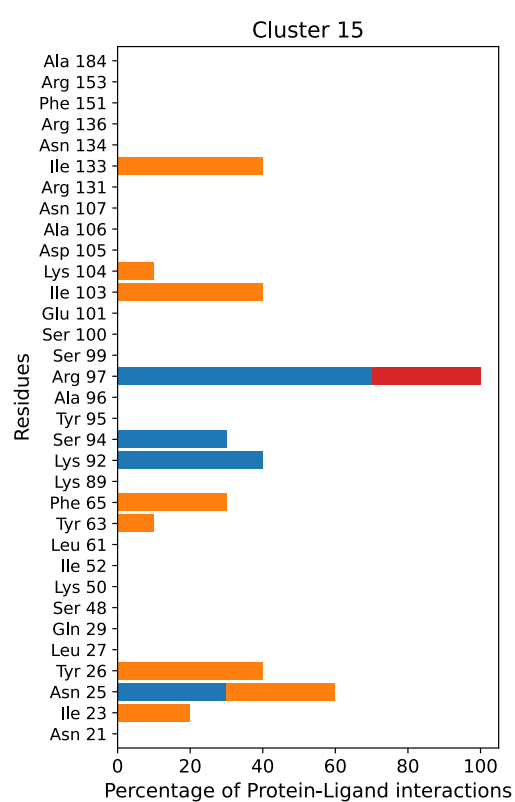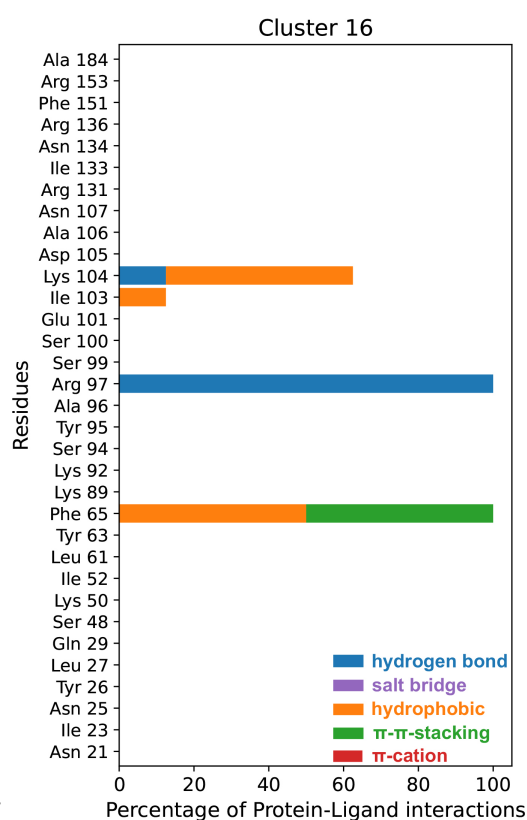

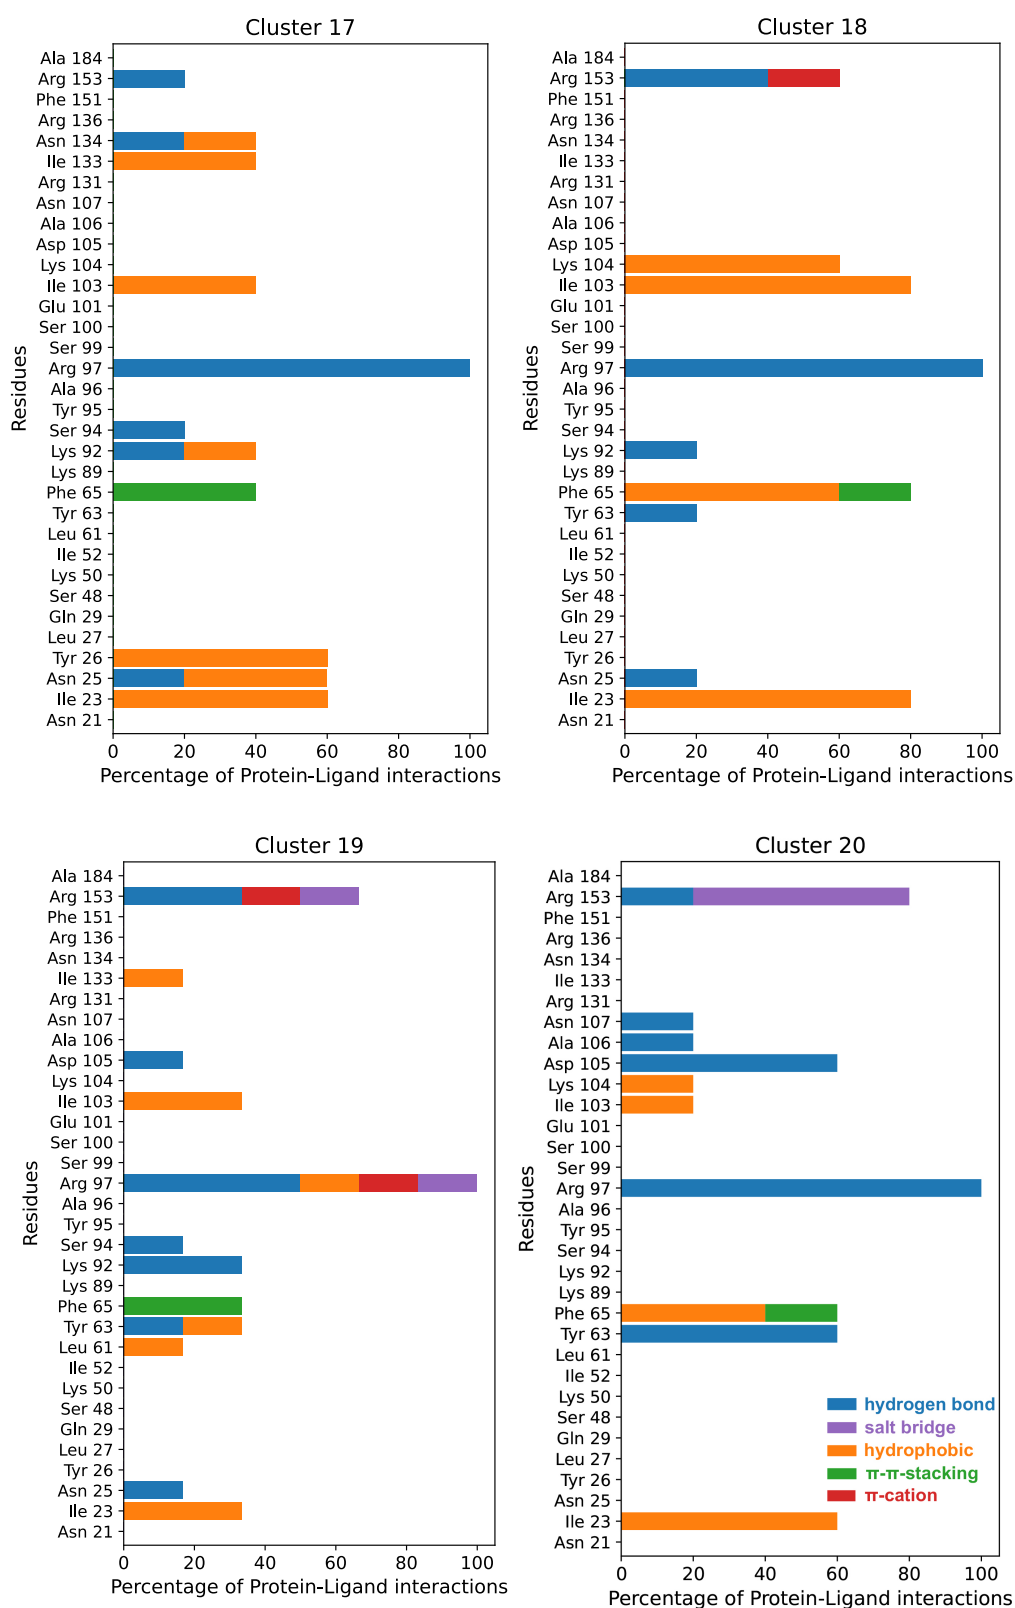

**Figure S4.** Protein-ligand interaction fingerprints for the 20 most populated clusters.

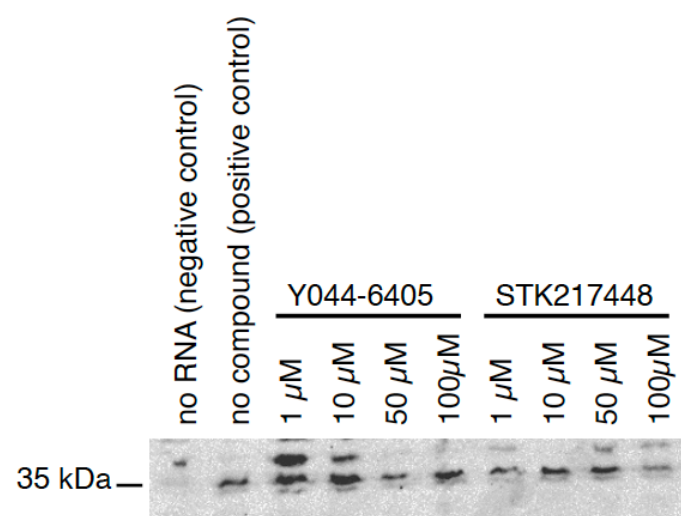

**Figure S5.** RNA–protein pull-down of HuR as described in Figure 4(A) of the main text with different concentrations of the compounds Y044-6405 and STK217448.

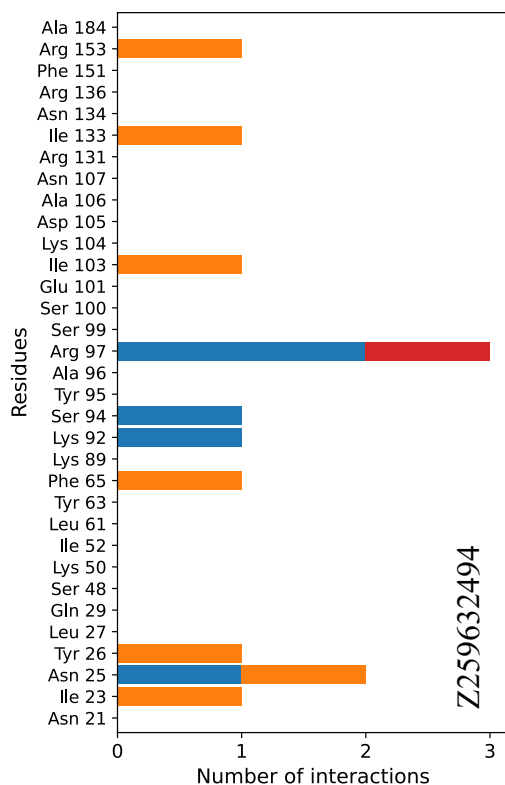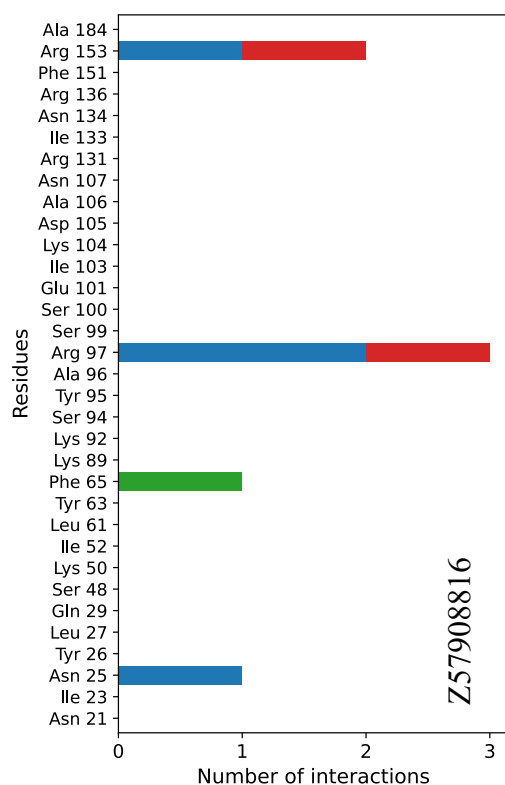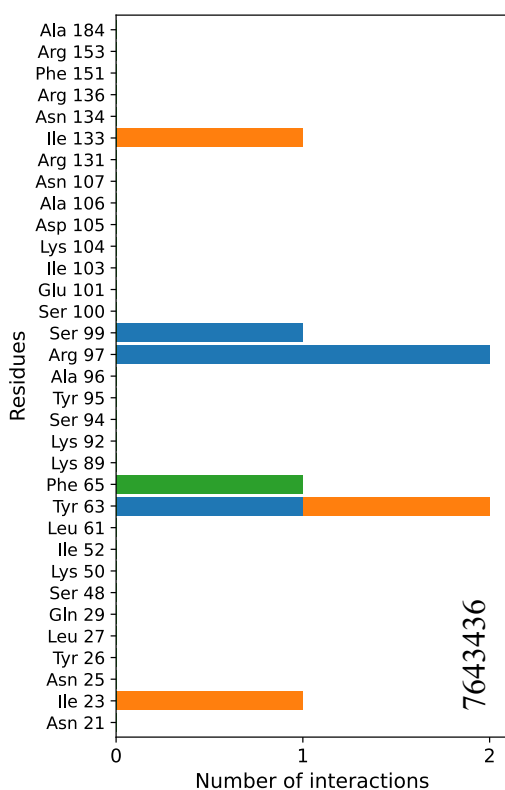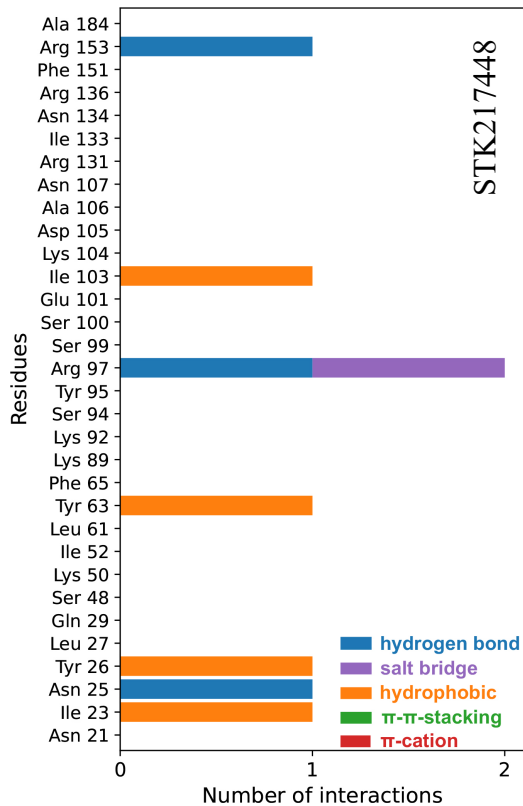

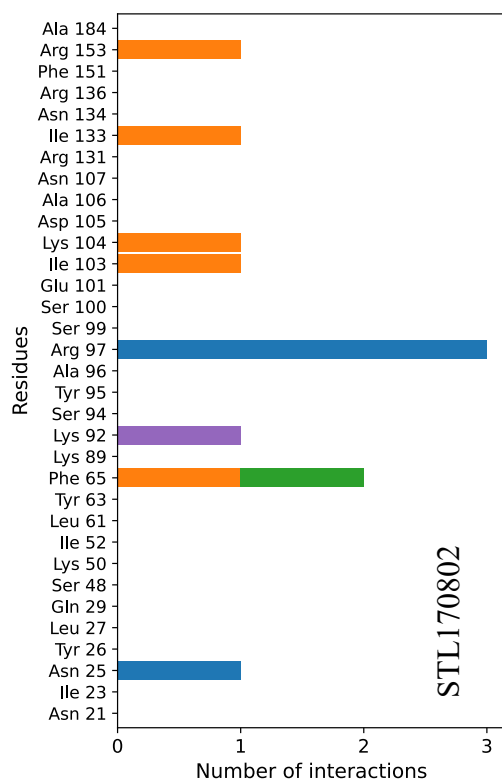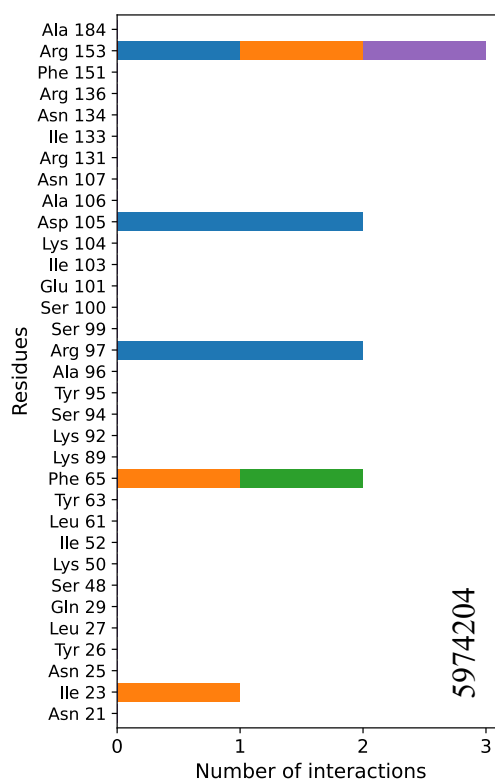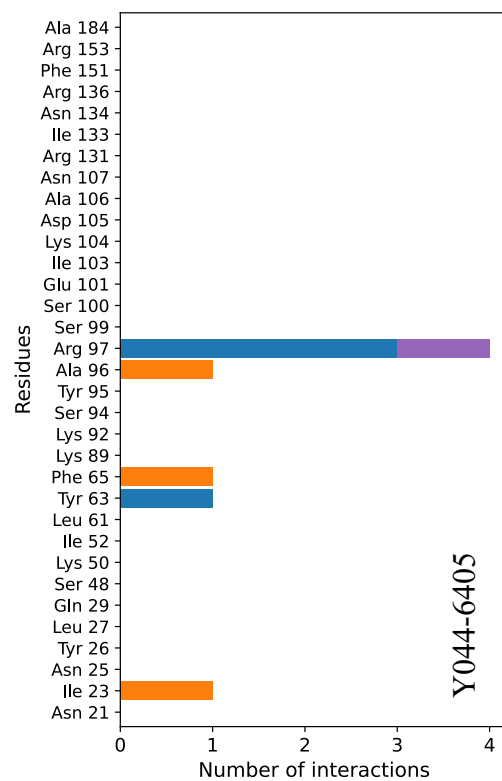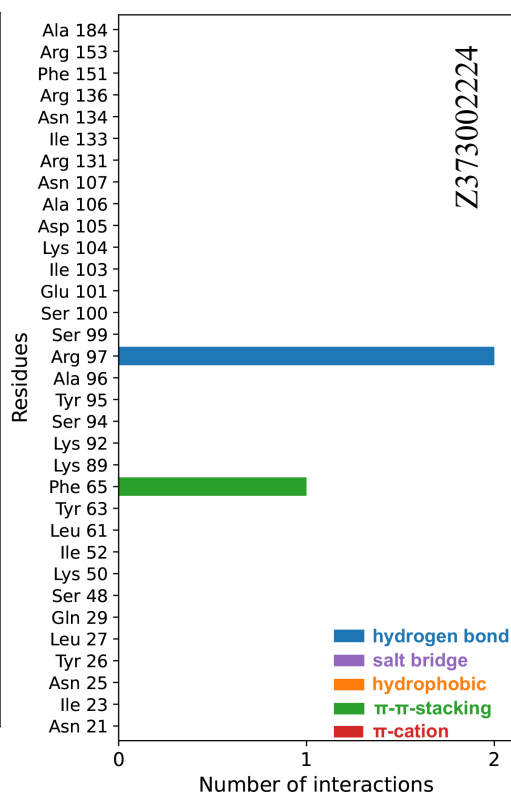

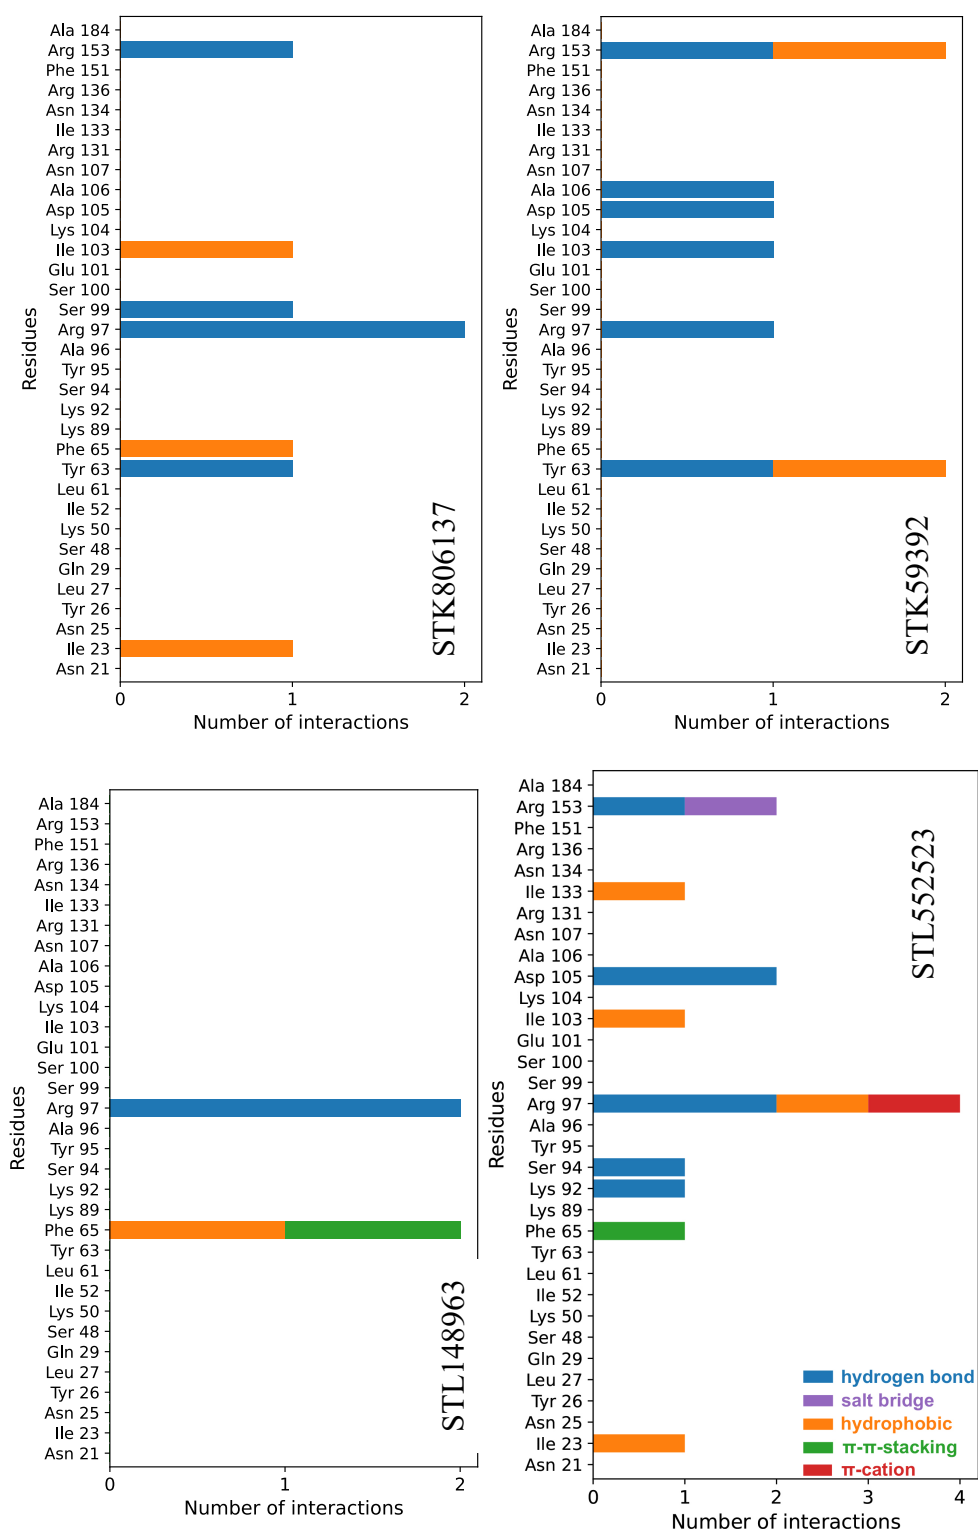

**Figure S6.** PLIFs of the other 12 bought compounds (C1) derivative, Z259632494; (C2) derivative, Z57908816; (C5) representative, 7643436; (C6) derivative, STK217448; (C7) member, STL170802; (C8) derivative, 5974204; (C9) member, Y044-6405; (C11) representative, STK018404; (C12) derivative, Z373002224; (C13) derivative, STK806137; (C15) derivative, STK593921; (C16) derivative, STL148963; (C19) representative, STL52523.



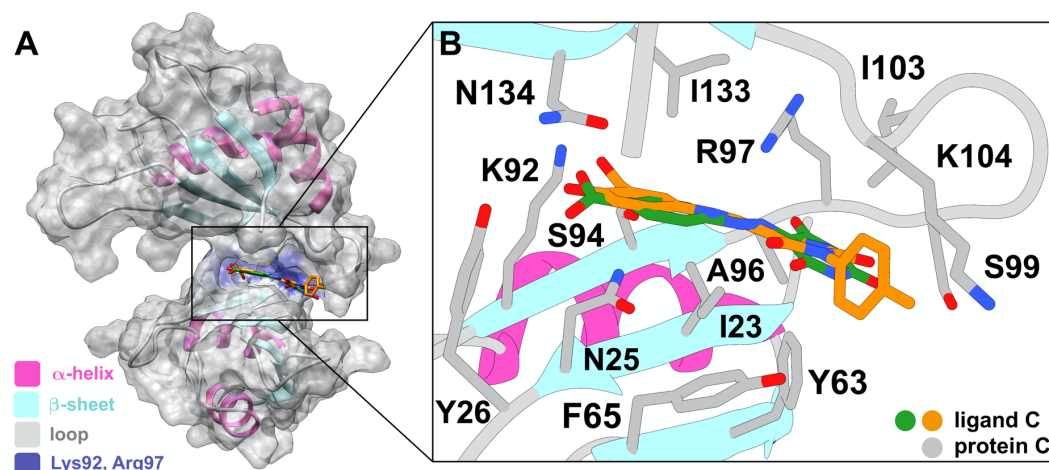

**Figure S7.** (A) Surface representation of HuR RRM1/2 (PDB code 4ED5) with the two docked ligands STK018404 and STL170802. (B) Docking pose in licorice fashion of compound STK018404 and STL170802 (with labeled residues within 4 Å of the ligands).

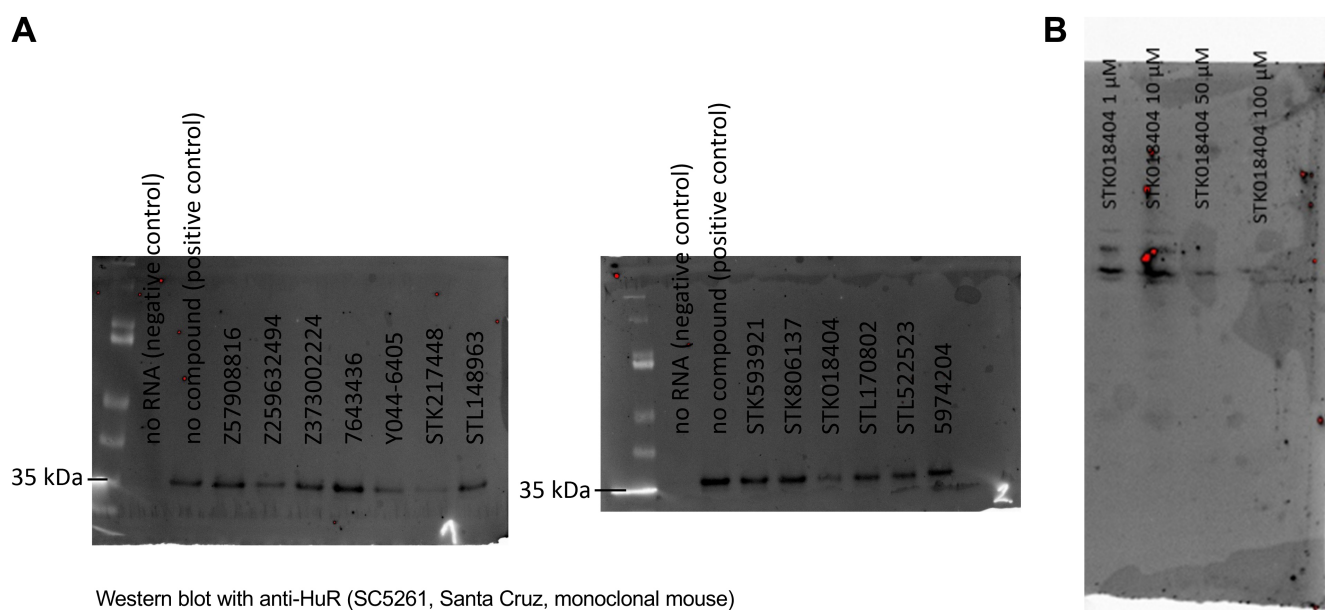

**Figure S8.** Uncropped western blot gels corresponding to the RNA pull-down assays shown in Figure 4 in the main text. (A) RNA-protein pull-down of HuR with its target RNA motif (AU-UUUUAUUUU) in the absence (negative control) or presence of the respective compounds (final concentration 100 μM). RNA-bound proteins were analyzed on western blots detecting HuR. A negative control that does contain RNA and a positive control with no compound were included. (B) RNA-protein pull-down of HuR as described in (A) with different concentrations of the compound STK018404.

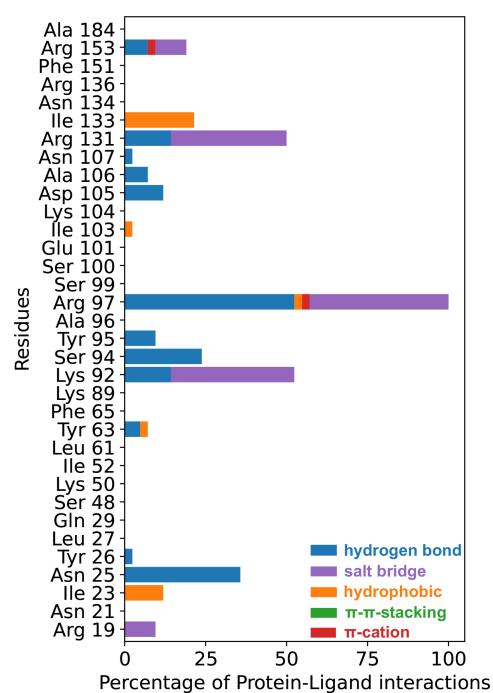

**Figure S9.** PLIF of the twenty-three poses obtained upon docking of the decoys generated with the DUDE-Z webserver [1].

**Table S1.** List of previously reported small molecule inhibitors of the HuR protein as of January 2023.

| #  | Compound name            | Status          | IC <sub>50</sub> [μM] | PubChem ID | Ref. |
|----|--------------------------|-----------------|-----------------------|------------|------|
| 1  | MS-444                   | <i>In vivo</i>  | 2.1-40.7              | 132904     | [2]  |
| 2  | Dehydromutactin          | <i>In vitro</i> | 39.0-130.0            | 54685140   | [2]  |
| 3  | Okicenone                | <i>In vitro</i> | 0.53-2.9              | 132015     | [2]  |
| 4  | Quercetin                | <i>In cell</i>  | 5.78-31.04            | 5280343    | [3]  |
| 5  | 6n                       | <i>In cell</i>  | 0.015                 | 137652621  | [4]  |
| 6  | 24                       | <i>In vitro</i> | -                     | -          | [5]  |
| 7  | CMLD-1                   | <i>In vitro</i> | 5.98                  | 16060621   | [6]  |
| 8  | CMLD-4                   | <i>In vitro</i> | 5.22                  | 24868003   | [6]  |
| 9  | CMLD-5                   | <i>In vitro</i> | 9.13                  | 16746465   | [6]  |
| 10 | CMLD-6                   | <i>In vitro</i> | 8.88                  | 16746321   | [6]  |
| 11 | CMLD-3                   | <i>In vitro</i> | 7.11                  | 16746461   | [6]  |
| 12 | 31                       | <i>In vitro</i> | 44.4                  | 265580     | [7]  |
| 13 | 32                       | <i>In vitro</i> | 21.7                  | 137651476  | [7]  |
| 14 | 23                       | <i>In vitro</i> | 41.0                  | 66672      | [7]  |
| 15 | 30                       | <i>In vitro</i> | 41.9                  | 54677920   | [7]  |
| 16 | MPT0B098                 | <i>In vitro</i> | 0.08-0.51             | 50898338   | [8]  |
| 17 | SP600125                 | <i>In vitro</i> | 0.12-16.0             | 8515       | [9]  |
| 18 | Trichostatin A           | <i>In vitro</i> | -                     | 444732     | [9]  |
| 19 | 5-aza-2-deoxycytidine    | <i>In vivo</i>  | 0.01-0.05             | 460487     | [9]  |
| 20 | N-Benzylcantharidinamide | <i>In vitro</i> | 50.0-100.0            | -          | [10] |
| 21 | Triptolide               | <i>In vivo</i>  | 0.01-0.03             | 107985     | [11] |
| 22 | Leptomycin B             | <i>In vivo</i>  | 0.01                  | 6917907    | [12] |
| 23 | Selinexor                | <i>In vivo</i>  | 0.12-0.22             | 71481097   | [13] |

|    |                              |                 |           |           |      |
|----|------------------------------|-----------------|-----------|-----------|------|
| 24 | Latrunculin A                | <i>In vitro</i> | 0.33-0.76 | 445420    | [14] |
| 25 | Blebbistatin                 | <i>In cell</i>  | 0.43-22.8 | 3476986   | [14] |
| 26 | Mitoxantrone                 | <i>In vivo</i>  | 0.01-1.13 | 4212      | [5]  |
| 27 | Suramin                      | <i>In vivo</i>  | 732       | 5361      | [15] |
| 28 | NSC 5836                     | <i>In vitro</i> | 14.7      | 3034178   | [7]  |
| 29 | NSC 7572                     | <i>In vitro</i> | 41.0      | 66672     | [7]  |
| 30 | NSC 44750                    | <i>In vitro</i> | 26.9      | 239577    | [7]  |
| 31 | NSC 50648                    | <i>In vitro</i> | 97.4      | 242249    | [7]  |
| 32 | NSC 62685                    | <i>In vitro</i> | 16.7      | 247668    | [7]  |
| 33 | NSC 123418                   | <i>In vitro</i> | 69.9      | 276150    | [7]  |
| 34 | NSC 143491                   | <i>In vitro</i> | 21.7      | 9575999   | [7]  |
| 35 | NSC 227186                   | <i>In vitro</i> | 41.9      | 54706138  | [7]  |
| 36 | NSC 651084                   | <i>In vitro</i> | 17.4      | 6713252   | [7]  |
| 37 | Myricetin                    | <i>In vitro</i> | 1.0       | 5281672   | [3]  |
| 38 | b-40                         | <i>In cell</i>  | 0.38      | 1806245   | [16] |
| 39 | Ellagic acid                 | <i>In vitro</i> | 0.6       | 5281855   | [3]  |
| 40 | (-)-Epicatechin gallate      | <i>In vitro</i> | 0.2       | 107905    | [3]  |
| 41 | Rhamnetin                    | <i>In vitro</i> | 1.2       | 5281691   | [3]  |
| 42 | Cryptotanshinone             | <i>In cell</i>  | 6.0       | 160254    | [17] |
| 43 | (-)-Epigallocatechin gallate | <i>In vitro</i> | 0.2       | 65064     | [3]  |
| 44 | Dihydrotanshinone (DHTS)     | <i>In vivo</i>  | 0.84-1.2  | 5316743   | [17] |
| 45 | 6a                           | <i>In cell</i>  | 0.0128    | 132251303 | [4]  |
| 46 | b-41                         | <i>In cell</i>  | 6.21      | 58739563  | [16] |
| 47 | b-68                         | <i>In cell</i>  | -         | 1801337   | [16] |
| 48 | a-63                         | <i>In cell</i>  | -         | 6161395   | [16] |

|    |                        |                 |           |           |      |
|----|------------------------|-----------------|-----------|-----------|------|
| 49 | Azaphilone-9           | <i>In vitro</i> | 51.9-67.6 | 57326411  | [18] |
| 50 | CMLD-2                 | <i>In vitro</i> | 4.44      | 16746438  | [6]  |
| 51 | Tanshinone I           | <i>In cell</i>  | -         | 114917    | [17] |
| 52 | HuR inhibitor 5        | <i>In cell</i>  | 15-27     | 3634762   | [19] |
| 53 | 1                      | <i>In vitro</i> | -         | 156010691 | [20] |
| 54 | 2                      | <i>In vitro</i> | -         | 155560371 | [20] |
| 55 | 3                      | <i>In vitro</i> | -         | 155517914 | [20] |
| 56 | 4                      | <i>In vitro</i> | -         | 155540762 | [20] |
| 57 | Hyperoside             | <i>In vitro</i> | -         | 5281643   | [21] |
| 58 | Rutin                  | <i>In vitro</i> | -         | 5280805   | [21] |
| 59 | Isovitexin             | <i>In vitro</i> | -         | 162350    | [21] |
| 60 | Vitexin-2-O-rhamnoside | <i>In vitro</i> | -         | 5282151   | [21] |
| 61 | Aesculin               | <i>In vitro</i> | -         | 5281417   | [21] |
| 62 | Novobiocin             | <i>In vitro</i> | -         | 54675769  | [21] |
| 63 | Chlorogenic acid       | <i>In vitro</i> | -         | 1794427   | [21] |
| 64 | 7-hydroxymatairesinol  | <i>In vitro</i> | -         | 44147426  | [21] |
| 65 | Colchicoside           | <i>In vitro</i> | -         | 92763     | [21] |
| 66 | Asiaticoside           | <i>In vitro</i> | -         | 11954171  | [21] |
| 67 | Embelin                | <i>In cell</i>  | -         | 3218      | [22] |
| 68 | KH-3                   | <i>In cell</i>  | 3.34      | 45138018  | [23] |
| 69 | KH-3 derivative 1 (1c) | <i>In cell</i>  | 4.74      | 155343380 | [23] |
| 70 | KH-3 derivative 2 (7c) | <i>In cell</i>  | 1.31      | 11187381  | [23] |

**Table S2.** Docking scores of the thirteen experimentally tested ligands (grey cell) and the known HuR inhibitors.

| Compound name   | Docking score [kcal/mol] | Compound name                | Docking score [kcal/mol] |
|-----------------|--------------------------|------------------------------|--------------------------|
| Z259632494      | -8.646                   | NSC 44750                    | -5.949                   |
| Z57908816       | -4.494                   | NSC 50648                    | -5.507                   |
| 7643436         | -8.618                   | NSC 62685                    | -6.261                   |
| STK217448       | -8.287                   | NSC 123418                   | -2.736                   |
| STL170802       | -8.623                   | NSC 143491                   | -5.803                   |
| 5974204         | -8.561                   | NSC 227186                   | -5.485                   |
| Y044-6405       | -9.002                   | NSC 651084                   | -4.937                   |
| STK018404       | -10.154                  | Myricetin                    | -5.630                   |
| Z373002224      | -6.083                   | b-40                         | -5.897                   |
| STK806137       | -8.681                   | Ellagic acid                 | -5.427                   |
| STK593921       | -5.014                   | (-)-Epicatechin gallate      | -6.149                   |
| STL148963       | -3.350                   | Rhamnetin                    | -2.508                   |
| STL522523       | -9.201                   | Cryptotanshinone             | -3.978                   |
| MS-444          | -5.226                   | (-)-Epigallocatechin gallate | -6.212                   |
| Dehydromutactin | -5.403                   | Dihydrotanshinone (DHTS)     | -3.963                   |
| Okicenone       | -5.514                   | 6a                           | -5.253                   |
| Quercetin       | -6.475                   | b-41                         | -4.969                   |
| 6n              | -4.151                   | b-68                         | -5.149                   |
| 24              | -4.590                   | a-63                         | -4.498                   |
| CMLD-1          | -4.586                   | Azaphilone-9                 | -3.784                   |
| CMLD-4          | -3.667                   | CMLD-2                       | -3.965                   |
| CMLD-5          | -3.661                   | Tanshinone I                 | -4.690                   |

|                          |        |                        |        |
|--------------------------|--------|------------------------|--------|
| CMLD-6                   | -4.045 | HuR inhibitor 5        | -4.320 |
| CMLD-3                   | -3.684 | 1                      | -3.163 |
| 31                       | -3.209 | 2                      | -4.940 |
| 32                       | -5.874 | 3                      | -6.945 |
| 23                       | -5.249 | 4                      | -5.393 |
| 30                       | -5.132 | Hyperoside             | -4.485 |
| MPT0B098                 | 0.090  | Rutin                  | -6.708 |
| SP600125                 | -7.062 | Isovitexin             | -5.854 |
| Trichostatin A           | -3.380 | Vitexin-2-O-rhamnoside | -6.320 |
| 5-aza-2-deoxycytidine    | -4.140 | Aesculin               | -5.816 |
| N-Benzylcantharidinamide | -4.437 | Novobiocin             | -5.038 |
| Triptolide               | -2.731 | Chlorogenic acid       | -6.284 |
| Leptomycin B             | -5.892 | 7-hydroxymatairesinol  | -6.507 |
| Selinexor                | -5.084 | Colchicoside           | -5.767 |
| Latrunculin A            | -4.269 | Asiaticoside           | -6.402 |
| Blebbistatin             | -4.754 | Embelin                | -2.156 |
| Mitoxantrone             | -4.978 | KH-3                   | -3.387 |
| Suramin                  | -8.556 | KH-3 derivative 1 (1c) | -5.417 |
| NSC 5836                 | -3.913 | KH-3 derivative 2 (7c) | -4.980 |
| NSC 7572                 | -5.249 |                        |        |





|                                             |     |     |     |   |   |   |   |
|---------------------------------------------|-----|-----|-----|---|---|---|---|
| 23                                          | 32  | 68  | 0   | 0 | 0 | 0 | 0 |
| 30                                          | 100 | 0   | 0   | 0 | 0 | 0 | 0 |
| 31                                          | 100 | 0   | 0   | 0 | 0 | 0 | 0 |
| 32                                          | 81  | 19  | 0   | 0 | 0 | 0 | 0 |
| Trichostatin A                              | 0   | 0   | 100 | 0 | 0 | 0 | 0 |
| 5-aza-2-deoxycytidine                       | 94  | 6   | 0   | 0 | 0 | 0 | 0 |
| Triptolide no off-target found <sup>#</sup> |     |     |     |   |   |   |   |
| Blebistatin                                 | 3   | 97  | 0   | 0 | 0 | 0 | 0 |
| HuR inhibitor 5                             | 0   | 100 | 0   | 0 | 0 | 0 | 0 |
| 5974204                                     | 31  | 69  | 0   | 0 | 0 | 0 | 0 |
| 7643436                                     | 0   | 100 | 0   | 0 | 0 | 0 | 0 |
| STK018404                                   | 93  | 7   | 0   | 0 | 0 | 0 | 0 |
| STL170802                                   | 100 | 0   | 0   | 0 | 0 | 0 | 0 |
| STK217448                                   | 0   | 0   | 100 | 0 | 0 | 0 | 0 |
| STK593921                                   | 0   | 0   | 100 | 0 | 0 | 0 | 0 |
| STK806137                                   | 0   | 0   | 100 | 0 | 0 | 0 | 0 |
| STL148963                                   | 62  | 0   | 38  | 0 | 0 | 0 | 0 |
| STL522523                                   | 8   | 0   | 92  | 0 | 0 | 0 | 0 |
| Y044-6405                                   | 65  | 1   | 34  | 0 | 0 | 0 | 0 |
| Z57908816                                   | 0   | 0   | 99  | 0 | 0 | 1 | 0 |
| Z373002224                                  | 88  | 0   | 12  | 0 | 0 | 0 | 0 |
| Z259632494 no off-target found <sup>#</sup> |     |     |     |   |   |   |   |

\* Probability equal to 0% means that the confidence of the off-target prediction is very low, due to limited similarity between the query ligand and the known actives present in the SwissTargetPrediction database. In this regard, the webserver combines 2D and 3D similarity measures between the query and the database molecules, with different thresholds [24]. This might result in predicted off-targets with a certain number of know actives similar in 3D to the query ligand, but no known active similar in 2D, in which case the probability of the investigated but no known active similar in 2D, in which case the probability of the investigated

# “No off-target found” indicates that there are no active molecules in the SwissTargetPrediction database similar to the query molecule and thus no off-target was predicted.

**Table S4.** Protein class of the predicted top off-targets for the 32 representatives of the known HuR known inhibitors and the thirteen experimentally tested ligands. Color code for the ligands is the same as in Table S3.

| Drug                     | Top Targets                                 |                                         |                             |                             |
|--------------------------|---------------------------------------------|-----------------------------------------|-----------------------------|-----------------------------|
| 1                        | Kinase                                      | Family A GPCR                           |                             |                             |
| DHTS                     | Aldose reductase                            | Acetylcholinesterase                    |                             |                             |
| 6a                       | Kinase                                      | Family A GPCR                           |                             |                             |
| b-40                     | Kinase                                      | Family A GPCR                           |                             |                             |
| Quercetin                | Kinase                                      | Lyase                                   | Protease                    |                             |
| Hyperoside               | Aldose reductase                            | Carbonic anhydrases 2, 4, 7, 12         | NADPH oxidase 4             | Adrenergic receptor alpha-2 |
| Chlorogenic acid         | Aldose reductase                            | Aldo-keto reductase family 1 member B10 |                             |                             |
| Mitoxantrone             | Electrochemical transporter                 | Kinase                                  | Family A GPCR               |                             |
| CMLD-2                   | Eukaryotic translation inhibition factor 4H | Family A GPCR                           | Kinase                      | Protease                    |
| KH-3 d1                  | Eraser                                      | Protease                                |                             |                             |
| NSC 62685                | 5'-nucleotidase                             |                                         |                             |                             |
| Azaphilone-9             | Kinase                                      | Family A GPCR                           |                             |                             |
| Embelin                  | Histone Acetyltransferase                   | Macrophage-expressed gene 1 protein     | Arachidonate 5-lipoxygenase |                             |
| MPT0B098                 | Family A GPCR                               | Kinase                                  |                             |                             |
| Latrunculin              |                                             |                                         |                             |                             |
| Leptomycin B             | Family A, B, C GPCR                         | Eraser                                  | Protease                    |                             |
| MS-444                   | no off-target found                         |                                         |                             |                             |
| N-Benzylcantharidinamide | Family A GPCR                               | Protease                                | Reader                      |                             |
| Selinexor                | Kinase                                      | Protease                                | Family A GPCR               |                             |
| SP600125                 | Kinase                                      | Family A GPCR                           |                             |                             |
| Suramin                  |                                             |                                         |                             |                             |
| Dehydromutactin          | Oxidoreductase                              | Voltage-gated ion channel               |                             |                             |
| Okicenone                | no off-target found                         |                                         |                             |                             |
| 23                       | Kinase                                      | Lyase                                   | Family A GPCR               |                             |

|                       |                             |                   |                                   |               |
|-----------------------|-----------------------------|-------------------|-----------------------------------|---------------|
| 30                    | Kinase                      | Protease          |                                   |               |
| 31                    |                             |                   |                                   |               |
| 32                    | Protease                    | Family A GPCR     |                                   |               |
| Trichostatin A        | Eraser                      | Protease          | Family A GPCR                     |               |
| 5-aza-2-deoxycytidine | Protease                    | Hydrolase         |                                   |               |
| Triptolide            | no off-target found         |                   |                                   |               |
| Blebistatin           | Kinase                      | Protease          | Family A GPCR                     |               |
| HuR inhibitor 5       | Kinase                      | Protease          | Family A GPCR                     |               |
| 5974204               | Kinase                      | Family A GPCR     |                                   |               |
| 7643436               | Kinase                      | Lyase             |                                   |               |
| STK018404             | Oxidoreductase              | Transferase       | Kinase                            |               |
| STL170802             | Eraser                      | Phosphodiesterase | Lyase                             |               |
| STK217448             | Family A GPCR               | Kinase            | Voltage-gated ion channel         |               |
| STK593921             | Kinase                      | Potease           | Eraser                            | Family A GPCR |
| STK806137             | Protease                    | Lyase             | Kinase                            |               |
| STL148963             | Protease                    | Family A GPCR     | Fatty acid protein binding family | Family A GPCR |
| STL522523             | Protease                    | Kinase            |                                   |               |
| Y044-6405             | Eraser                      | Kinase            | Lyase                             |               |
| Z57908816             | Adenosine alpha 2a receptor |                   |                                   |               |
| Z373002224            | Kinase                      | Family A GPCR     |                                   |               |
| Z259632494            | no off-target found         |                   |                                   |               |

**Table S5.** Docking scores of the twenty-three successfully docked decoys.

| Compound name    | Docking score [kcal/mol] | Compound name    | Docking score [kcal/mol] |
|------------------|--------------------------|------------------|--------------------------|
| ZINC000008220417 | -6.929                   | ZINC000005112560 | -5.484                   |
| ZINC000005340116 | -6.782                   | ZINC000712777334 | -5.352                   |
| ZINC000006827695 | -6.687                   | ZINC000008214677 | -5.351                   |
| ZINC000000895180 | -6.388                   | ZINC000005828408 | -5.340                   |
| ZINC000002044203 | -5.933                   | ZINC000013542400 | -5.269                   |
| ZINC000001542148 | -5.930                   | ZINC000089222544 | -5.150                   |
| ZINC000004096278 | -5.929                   | ZINC000206744254 | -5.082                   |
| ZINC000004096089 | -5.866                   | ZINC000136274150 | -5.044                   |
| ZINC000001529331 | -5.856                   | ZINC000003869232 | -5.033                   |
| ZINC000020157024 | -5.795                   | ZINC000005840872 | -4.999                   |
| ZINC000029391179 | -5.487                   | ZINC000006090886 | -4.492                   |
| ZINC000001850486 | -5.484                   |                  |                          |

## References

1. Stein, R. M.; Yang, Y.; Balius, T. E.; O'Meara, M. J.; Lyu, J.; Young, J.; Tang, K.; Shoichet, B. K.; Irwin, J. J. Property-Unmatched Decoys in Docking Benchmarks. *J. Chem. Inf. Model.* **2021**, *61*, 699–714. <https://doi.org/10.1021/acs.jcim.0c00598>.
2. Meisner, N.-C.; Hintersteiner, M.; Mueller, K.; Bauer, R.; Seifert, J.-M.; Naegeli, H.-U.; Ottl, J.; Oberer, L.; Guenat, C.; Moss, S.; Harrer, N.; Woisetschlaeger, M.; Buehler, C.; Uhl, V.; Auer, M. Identification and Mechanistic Characterization of Low-Molecular-Weight Inhibitors for HuR. *Nat. Chem. Biol.* **2007**, *3*, 508–515. <https://doi.org/10.1038/nchembio.2007.14>.
3. Kwak, H.-J.; Jeong, K.-C.; Chae, M.-J.; Kim, S.-Y.; Park, W.-Y. Flavonoids Inhibit the AU-Rich Element Binding of HuC. *BMB Rep.* **2009**, *42*, 41–46. <https://doi.org/10.5483/BMBRep.2009.42.1.041>.
4. Manzoni, L.; Zucal, C.; Maio, D. D.; D'Agostino, V. G.; Thongon, N.; Bonomo, I.; Lal, P.; Miceli, M.; Baj, V.; Brambilla, M.; Cerofolini, L.; Elezgarai, S.; Biasini, E.; Luchinat, C.; Novellino, E.; Fragai, M.; Marinelli, L.; Provenzani, A.; Seneci, P. Interfering with HuR–RNA Interaction: Design, Synthesis and Biological Characterization of Tanshinone Mimics as Novel, Effective HuR Inhibitors. *J. Med. Chem.* **2018**, *61*, 1483–1498. <https://doi.org/10.1021/acs.jmedchem.7b01176>.
5. D'Agostino, V. G.; Adami, V.; Provenzani, A. A Novel High Throughput Biochemical Assay to Evaluate the HuR Protein–RNA Complex Formation. *PLoS ONE* **2013**, *8*, e72426. <https://doi.org/10.1371/journal.pone.0072426>.
6. Wu, X.; Lan, L.; Wilson, D. M.; Marquez, R. T.; Tsao, W.; Gao, P.; Roy, A.; Turner, B. A.; McDonald, P.; Tunge, J. A.; Rogers, S. A.; Dixon, D. A.; Aubé, J.; Xu, L. Identification and Validation of Novel Small Molecule Disruptors of HuR–mRNA Interaction. *ACS Chem. Biol.* **2015**, *10*, 1476–1484. <https://doi.org/10.1021/cb500851u>.
7. Wang, Z.; Bhattacharya, A.; Ivanov, D. N. Identification of Small-Molecule Inhibitors of the HuR/RNA Interaction Using a Fluorescence Polarization Screening Assay Followed by NMR Validation. *PLOS ONE* **2015**, *10*, e0138780. <https://doi.org/10.1371/journal.pone.0138780>.
8. Cheng, Y.-C.; Liou, J.-P.; Kuo, C.-C.; Lai, W.-Y.; Shih, K.-H.; Chang, C.-Y.; Pan, W.-Y.; Tseng, J. T.; Chang, J.-Y. MPT0B098, a Novel Microtubule Inhibitor That Destabilizes the Hypoxia-Inducible Factor-1 $\alpha$  mRNA through Decreasing Nuclear–Cytoplasmic Translocation of RNA-Binding Protein HuR. *Mol. Cancer Ther.* **2013**, *12*, 1202–1212. <https://doi.org/10.1158/1535-7163.MCT-12-0778>.
9. Hostetter, C.; Licata, L. A.; Costantino, C. L.; Witkiewicz, A.; Yeo, C.; Brody, J. R.; Keen, J. C. Cytoplasmic Accumulation of the RNA Binding Protein HuR Is Central to Tamoxifen Resistance in Estrogen Receptor Positive Breast Cancer Cells. *Cancer Biol. Ther.* **2008**, *7*, 1496–1506. <https://doi.org/10.4161/cbt.7.9.6490>.
10. Lee, J.-Y.; Chung, T.-W.; Choi, H.-J.; Lee, C. H.; Eun, J. S.; Han, Y. T.; Choi, J.-Y.; Kim, S.-Y.; Han, C.-W.; Jeong, H.-S.; Ha, K.-T. A Novel Cantharidin Analog N-Benzylcantharidinamide Reduces the Expression of MMP-9 and Invasive Potentials of Hep3B via Inhibiting Cytosolic Translocation of HuR. *Biochem. Biophys. Res. Commun.* **2014**, *447*, 371–377. <https://doi.org/10.1016/j.bbrc.2014.04.035>.
11. Sun, L.; Zhang, S.; Jiang, Z.; Huang, X.; Wang, T.; Huang, X.; Li, H.; Zhang, L. Triptolide Inhibits COX-2 Expression by Regulating mRNA Stability in TNF- $\alpha$ -Treated A549 Cells. *Biochem. Biophys. Res. Commun.* **2011**, *416*, 99–105. <https://doi.org/10.1016/j.bbrc.2011.11.004>.
12. Mutka, S. C.; Yang, W. Q.; Dong, S. D.; Ward, S. L.; Craig, D. A.; Timmermans, P. B. M. W. M.; Murli, S. Identification of Nuclear Export Inhibitors with Potent Anticancer Activity In Vivo. *Cancer Res.* **2009**, *69*, 510–517. <https://doi.org/10.1158/0008-5472.CAN-08-0858>.
13. Hing, Z. A.; Mantel, R.; Beckwith, K. A.; Guinn, D.; Williams, E.; Smith, L. L.; Williams, K.; Johnson, A. J.; Lehman, A. M.; Byrd, J. C.; Woyach, J. A.; Lapalombella, R. Selinexor Is Effective in Acquired Resistance to Ibrutinib and Synergizes with Ibrutinib in Chronic Lymphocytic Leukemia. *Blood* **2015**, *125*, 3128–3132. <https://doi.org/10.1182/blood-2015-01-621391>.
14. Doller, A.; Badawi, A.; Schmid, T.; Brauß, T.; Pleli, T.; Zu Heringdorf, D. M.; Piiper, A.; Pfeilschifter, J.; Eberhardt, W. The Cytoskeletal Inhibitors Latrunculin A and Blebbistatin Exert Antitumorigenic Properties in Human Hepatocellular Carcinoma Cells by Interfering with Intracellular HuR Trafficking. *Exp. Cell Res.* **2015**, *330*, 66–80. <https://doi.org/10.1016/j.yexcr.2014.09.010>.
15. Kakuguchi, W.; Nomura, T.; Kitamura, T.; Otsuguro, S.; Matsushita, K.; Sakaitani, M.; Maenaka, K.; Tei, K. Suramin, Screened from an Approved Drug Library, Inhibits HuR Functions and

- Attenuates Malignant Phenotype of Oral Cancer Cells. *Cancer Med.* **2018**, 7, 6269–6280. <https://doi.org/10.1002/cam4.1877>.
16. Chae, M.-J.; Sung, H. Y.; Kim, E.-H.; Lee, M.; Kwak, H.; Chae, C. H.; Kim, S.; Park, W.-Y. Chemical Inhibitors Destabilize HuR Binding to the AU-Rich Element of TNF- $\alpha$  mRNA. *Exp. Mol. Med.* **2009**, 41, 824. <https://doi.org/10.3858/emm.2009.41.11.088>.
  17. D'Agostino, V. G.; Lal, P.; Mantelli, B.; Tiedje, C.; Zucal, C.; Thongon, N.; Gaestel, M.; Latorre, E.; Marinelli, L.; Seneci, P.; Amadio, M.; Provenzani, A. Dihydrotanshinone-I Interferes with the RNA-Binding Activity of HuR Affecting Its Post-Transcriptional Function. *Sci. Rep.* **2015**, 5, 16478. <https://doi.org/10.1038/srep16478>.
  18. Kaur, K.; Wu, X.; Fields, J. K.; Johnson, D. K.; Lan, L.; Pratt, M.; Somoza, A. D.; Wang, C. C. C.; Karanicolas, J.; Oakley, B. R.; Xu, L.; De Guzman, R. N. The Fungal Natural Product Azaphilone-9 Binds to HuR and Inhibits HuR-RNA Interaction in Vitro. *PLOS ONE* **2017**, 12, e0175471. <https://doi.org/10.1371/journal.pone.0175471>.
  19. Filippova, N.; Yang, X.; Ananthan, S.; Sorochinsky, A.; Hackney, J. R.; Gentry, Z.; Bae, S.; King, P.; Nabors, L. B. Hu Antigen R (HuR) Multimerization Contributes to Glioma Disease Progression. *J. Biol. Chem.* **2017**, 292, 16999–17010. <https://doi.org/10.1074/jbc.M117.797878>.
  20. Della Volpe, S.; Nasti, R.; Queirolo, M.; Unver, M. Y.; Jumde, V. K.; Dömling, A.; Vasile, F.; Potenza, D.; Ambrosio, F. A.; Costa, G.; Alcaro, S.; Zucal, C.; Provenzani, A.; Di Giacomo, M.; Rossi, D.; Hirsch, A. K. H.; Collina, S. Novel Compounds Targeting the RNA-Binding Protein HuR. Structure-Based Design, Synthesis, and Interaction Studies. *ACS Med. Chem. Lett.* **2019**, 10, 615–620. <https://doi.org/10.1021/acsmchemlett.8b00600>.
  21. Vasile, F.; Della Volpe, S.; Ambrosio, F. A.; Costa, G.; Unver, M. Y.; Zucal, C.; Rossi, D.; Martino, E.; Provenzani, A.; Hirsch, A. K. H.; Alcaro, S.; Potenza, D.; Collina, S. Exploration of Ligand Binding Modes towards the Identification of Compounds Targeting HuR: A Combined STD-NMR and Molecular Modelling Approach. *Sci. Rep.* **2018**, 8, 13780. <https://doi.org/10.1038/s41598-018-32084-z>.
  22. Dai, Y.; Jiao, H.; Teng, G.; Wang, W.; Zhang, R.; Wang, Y.; Hebbard, L.; George, J.; Qiao, L. Embelin Reduces Colitis-Associated Tumorigenesis through Limiting IL-6/STAT3 Signaling. *Mol. Cancer Ther.* **2014**, 13, 1206–1216. <https://doi.org/10.1158/1535-7163.MCT-13-0378>.
  23. Wu, X.; Ramesh, R.; Wang, J.; Zheng, Y.; Armaly, A. M.; Wei, L.; Xing, M.; Roy, S.; Lan, L.; Gao, F. P.; Miao, Y.; Xu, L.; Aubé, J. Small Molecules Targeting the RNA-Binding Protein HuR Inhibit Tumor Growth in Xenografts. *J. Med. Chem.* **2023**, 66, 2032–2053. <https://doi.org/10.1021/acsmchem.2c01723>.
  24. Davies, M.; Nowotka, M.; Papadatos, G.; Dedman, N.; Gaulton, A.; Atkinson, F.; Bellis, L.; Overington, J. P. ChEMBL Web Services: Streamlining Access to Drug Discovery Data and Utilities. *Nucleic Acids Res.* **2015**, 43, W612–W620. <https://doi.org/10.1093/nar/gkv352>.
